# Supplementary material
Source: Springer Nature journal article supplement (https://www.springermedizin.de/resource/supplementary/13643_2012_46_MOESM1_ESM.pdf/9681358)

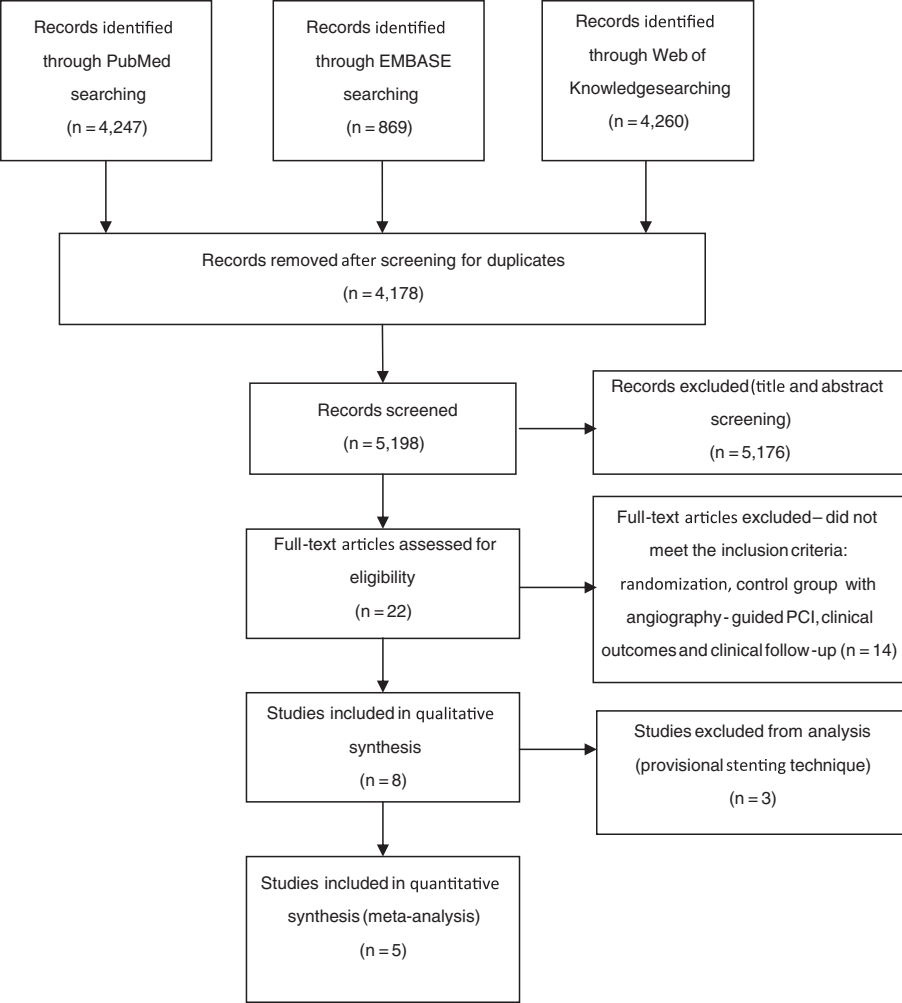

Supplement: MOESM1 [file 9681358]
